# Supplementary material for: Why people select the outpatient clinic of medical centers: a nationwide analysis in Taiwan
Source: PeerJ journal article supplement (doi:10.7717/peerj.9829), 2020-08-27
Supplement: VQuestionnaire_original_edition.pdf [file VQuestionnaire_original_edition.pdf]

# 影響社群網站使用者對門診就醫選擇決定因素之調查

各位先生、女士您好：

政府推動分級轉診制度已多年，但各地區的大醫院門診仍然門庭若市，許多民眾對社區基層醫療信心不足。此問卷的主要目的在於瞭解「影響社群網站使用者對門診就醫選擇決定因素之調查」，作為協助政府規劃增強基層門診服務模式的參考，以助於分級醫療與轉診制度之落實，提升民眾門診看診品質。

本網路匿名問卷調查，問卷填寫過程則約需 5 至 10 分鐘，請您慎重考慮後自由決定是否參加，如您無意願參與此調查，請您直接點選回上一頁，即可離開本網頁。您的寶貴意見將使得本研究得以順利完成，在此感謝您的協助。

臺北榮民總醫院家庭醫學部 林明慧醫師敬上

## 第一部份 門診就醫經驗

| 請依您最近兩年的[門診]就醫經驗圈選 | 非常<br>好<br>5 | 4 | 3 | 2 | 非常<br>不好<br>1 | 沒有<br>經驗<br>0 |
|--------------------|--------------|---|---|---|---------------|---------------|
| 1. 至[基層診所]門診的就醫經驗  | 5            | 4 | 3 | 2 | 1             | 0             |
| 2. 至[一般醫院]門診的就醫經驗  | 5            | 4 | 3 | 2 | 1             | 0             |
| 3. 至[醫學中心]門診的就醫經驗  | 5            | 4 | 3 | 2 | 1             | 0             |

4. 請問你有信任的基層診所家庭醫師嗎？ 1. 有 2. 沒有

5. 請問當你生病[不知道該看哪一科]時，你會優先選擇：

1) 基層診所門診 2) 一般醫院門診 3) 醫學中心門診

6. 請問當您有[急性不適症狀]時，你會優先選擇：

1) 基層診所門診 2) 一般醫院門診 3) 醫學中心門診

7. 自 106/4/15 日起健保署調高未經轉診越級至醫院門診的部分負擔，請問對您的影響為：

1) 有影響，會改變門診就醫的習慣 2) 沒有影響，會維持原來的門診就醫習慣

8. 你贊成小病至小診所看診，大病才至大醫院看診嗎？

1) 贊成，原因為  
……(可複選)

- A. 合理就診可以有效節省醫療資源的浪費
- B. 避免輕症上大醫院排擠重症病人的照顧
- C. 生病本來就該從最熟悉自己的家庭醫生看起
- D. 大醫院醫師時間應該花在照顧住院病人

2) 不贊成，原因為  
……(可複選)

- A. 一般病人無能力判斷病情輕重大小
- B. 怕基層診所醫師經驗不足擔誤病情
- C. 所在社區缺乏令人信賴的診所
- D. 平常都習慣在大醫院看診拿藥
- E. 基層診所開藥日數太短

## 第二部份 門診就醫場所的選擇考量

| I. 請問當您有不適症狀時，選擇門診就醫場所的考量為？ | 非常<br>重要<br>5 | 4 | 3 | 2 | 非常<br>不重要<br>1 |
|-----------------------------|---------------|---|---|---|----------------|
| 1. 考慮疾病的嚴重程度                | 5             | 4 | 3 | 2 | 1              |
| 2. 考慮醫療院所(診所或醫院)的知名度        | 5             | 4 | 3 | 2 | 1              |
| 3. 考慮醫療院所於媒體或社群網站之形象口碑      | 5             | 4 | 3 | 2 | 1              |
| 4. 醫療院所是否地點便利交通方便           | 5             | 4 | 3 | 2 | 1              |
| 5. 醫療院所是否有先進的檢查驗設備          | 5             | 4 | 3 | 2 | 1              |
| 6. 該醫療院所的藥物品質是否值得信任         | 5             | 4 | 3 | 2 | 1              |
| 7. 該醫療院所的專科科別是否多樣齊全         | 5             | 4 | 3 | 2 | 1              |
| 8. 該醫療院所的部分負擔費用是否較低         | 5             | 4 | 3 | 2 | 1              |
| 9. 該醫療院所醫師是否願意開立慢性病處方簽      | 5             | 4 | 3 | 2 | 1              |
| 10. 醫療院所其他醫療人員態度是否親切        | 5             | 4 | 3 | 2 | 1              |
| 11. 詢問親友是否推薦                | 5             | 4 | 3 | 2 | 1              |
| 12. 過去的就醫經驗                 | 5             | 4 | 3 | 2 | 1              |
| 13. 等候時間不會太長                | 5             | 4 | 3 | 2 | 1              |
| 14. 醫師醫術是否高明                | 5             | 4 | 3 | 2 | 1              |
| 15. 醫師態度是否親切                | 5             | 4 | 3 | 2 | 1              |
| 16. 醫師看診是否不匆促               | 5             | 4 | 3 | 2 | 1              |
| 17. 醫師是否詳細解說回答              | 5             | 4 | 3 | 2 | 1              |
| 18. 醫師是否令人信任                | 5             | 4 | 3 | 2 | 1              |
| 19. 醫師的知名度                  | 5             | 4 | 3 | 2 | 1              |
| 20. 醫師於媒體或社群網站之形象口碑         | 5             | 4 | 3 | 2 | 1              |

## 第三部份基本資料

1. 請問您本人是否罹患慢性病需定期至門診取藥：1)是      2)否
2. 請問與你同住或熟識的家人，是否罹患慢性病需定期至門診取藥：1)是      2)否
3. 請問您的居住地：
 

|              |              |              |
|--------------|--------------|--------------|
| 1) 台北市       | 3) 桃園市       | 5) 台南市       |
| 2) 新北市       | 4) 台中市       | 6) 高雄市       |
| 7) 六都之外的台灣北區 | 9) 六都之外的台灣南區 | 11) 花東離島其他地區 |
| 8) 六都之外的台灣中區 | 10) 宜蘭地區     |              |

4. 請問您的出生年：民國 \_\_\_\_\_ 年

5. 請問您的教育程度：

- 1) 小學      2) 國中、初中    3) 高中、高職    4) 專科、大學    5) 研究所以上

6. 請填寫您的性別： 1) 男     2) 女

7. 請問您目前的婚姻狀況是： 1) 未婚     2) 已婚     3) 其他

8. 請問您目前的職業是：

- |              |         |        |
|--------------|---------|--------|
| 1) 醫療相關      | 4) 工農漁業 | 8) 學生  |
| 2) 軍公教(不含醫療) | 5) 服務業  | 9) 已退休 |
| 3) 商業        | 6) 自由業  | 10) 其他 |
|              | 7) 家管   |        |

9. 請問您個人的平均每月收入大約是：

- |                                           |                                           |                                           |
|-------------------------------------------|-------------------------------------------|-------------------------------------------|
| <input type="checkbox"/> 1) 15,000 以下     | <input type="checkbox"/> 2) 15,001~30,000 | <input type="checkbox"/> 3) 30,001~50,000 |
| <input type="checkbox"/> 4) 50,001~70,000 | <input type="checkbox"/> 5) 70,001~90,000 | <input type="checkbox"/> 6) 90,001 以上     |

問卷到此結束，非常感謝您的耐心回答！如果您有關於臺灣分級醫療與轉診制度的想法，歡迎提供您寶貴的建議：
